# Supplementary material for: Continuous microfluidic fabrication of anisotropic microparticles for enhanced wastewater purification
Source: Royal Society of Chemistry journal article supplement (doi:10.1039/d0lc01298j), 2021-01-01
Supplement: d0lc01298j1.pdf [file d0lc01298j1.pdf]

## Supplementary Information

### Continuous Microfluidic Fabrication of Anisotropic Microparticles for Enhanced Wastewater Purification

Xiaokang Deng<sup>a</sup>, Yukun Ren<sup>\*ab</sup>, Likai Hou<sup>\*c</sup>, Tianyi Jiang<sup>a</sup> and Hongyuan Jiang<sup>\*a</sup>

<sup>a</sup> School of Mechatronics Engineering, Harbin Institute of Technology, West Da-zhi Street 92, Harbin, Heilongjiang, PR China 150001.

<sup>b</sup> State Key Laboratory of Robotics and System, Harbin Institute of Technology, West Da-zhi Street 92, Harbin, Heilongjiang, PR China 150001.

<sup>c</sup> College of Metrology and Measurement Engineering, China Jiliang University, Xueyuan Street 258, Hangzhou, Zhejiang, P.R. China, 310018.

\*Corresponding Author.

E-mail: rykhit@hit.edu.cn, houlikai@cjlu.edu.cn, jhy\_hit@hit.edu.cn

**Keywords:** anisotropic microparticles, tailored shapes, oil-droplets-filled microfibers, wastewater purification, microfluidics

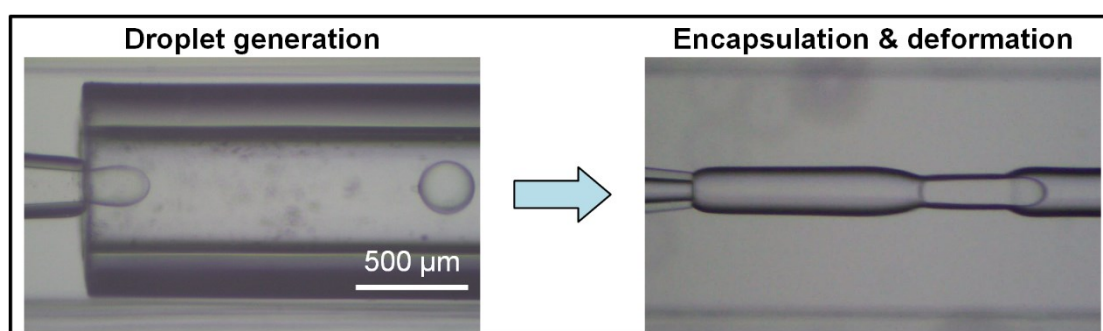

**Figure S1** Optical images showing the fabrication of monodisperse oil-droplet precursors (left) and the encapsulation of deformed oil-droplet templates into microfiber (right).

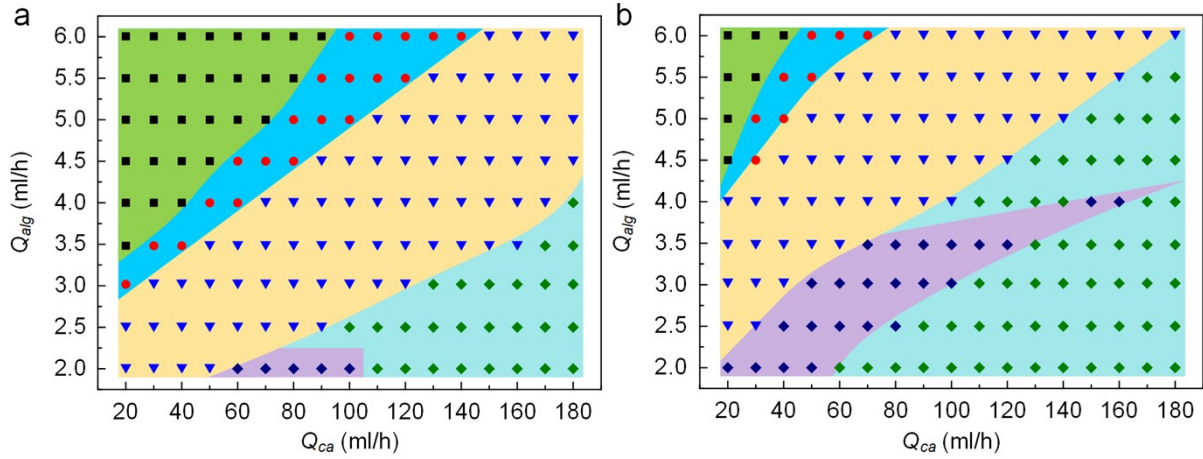

**Figure S2** (a) Phase diagram for various shapes of oil-encapsulants within microfiber under different flow rates of middle alginate ( $Q_{alg}$ ) and outer calcium chloride ( $Q_{ca}$ ) phases, while the flow rate of inner oil phase ( $Q_{oil}$ ) is fixed at  $50 \mu\text{l h}^{-1}$ . (b) Phase diagram for various shapes of oil-encapsulants within microfiber under different flow rates of  $Q_{alg}$  and  $Q_{ca}$ , while  $Q_{oil}$  is fixed at  $200 \mu\text{l h}^{-1}$ . The viscosity of oil phase is  $0.431 \text{ Pa}\cdot\text{s}$ .

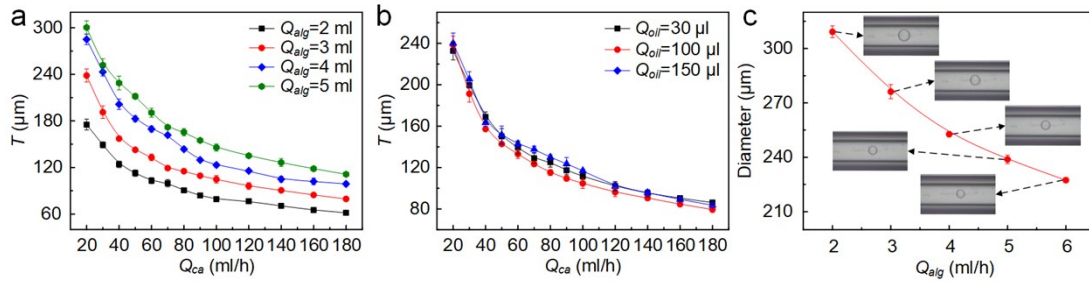

**Figure S3** (a) The relationship between the thickness of microfiber and  $Q_{ca}$  under different  $Q_{alg}$ , the  $Q_{oil}$  is fixed at  $100 \mu\text{l h}^{-1}$ . (b) The relationship between the thickness of microfiber and  $Q_{ca}$  under different  $Q_{oil}$ , the  $Q_{alg}$  is fixed at  $3 \text{ ml h}^{-1}$ . (c) The relationship between the diameter of oil-droplet precursors and  $Q_{alg}$  under fixed  $Q_{ca}: 40 \text{ ml h}^{-1}$  and  $Q_{oil}: 100 \mu\text{l h}^{-1}$ .

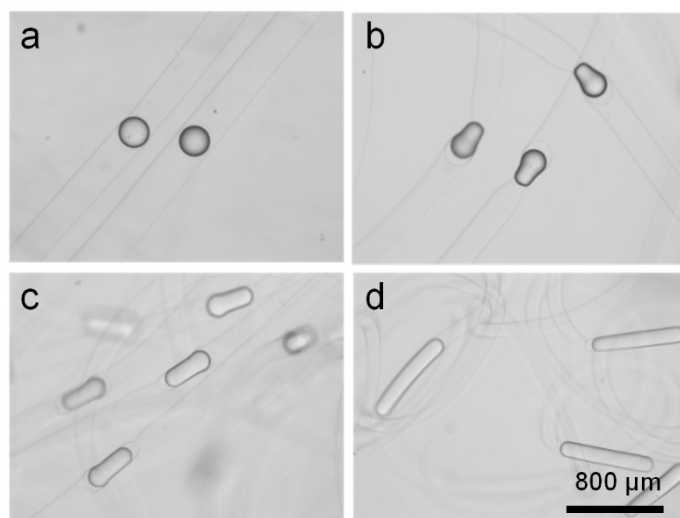

**Figure S4** (a-d) Optical micrographs of four different kinds of oil-droplet templates within microfibers: (a) spherical shape (b) pear-like shape (c) maraca -like shape and (d) rod-like shape.

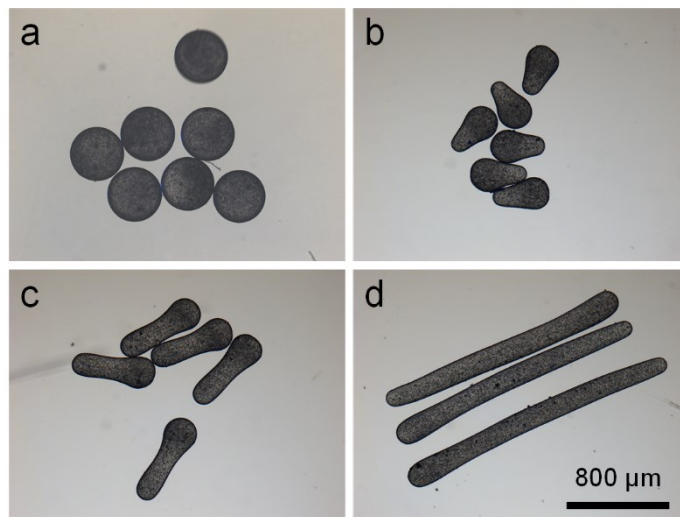

**Figure S5** (a-d) Optical micrographs of magnetic PDMS microparticles with their shapes ranging from (a) sphere to (b) pear-like, (c) maraca-like and (d) rod-like.

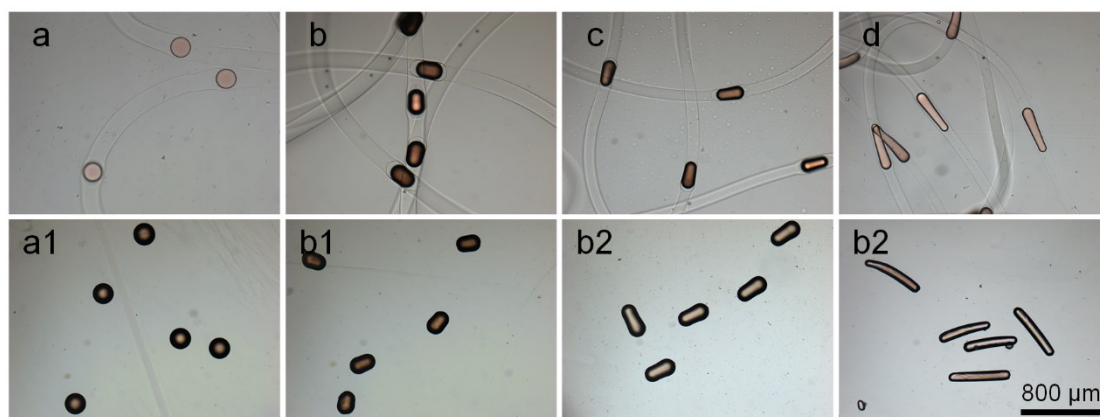

**Figure S6** (a-d) Optical micrographs of ETPTA-droplet templates within microfiber and (a1-d1) their corresponding solidified microparticles with shapes changing from (a,a1) sphere to (b,b1) ellipsoid, (c,c1) maraca-like and (d,d1) rod-like, where the oil-droplet templates are dyed with oil red O.

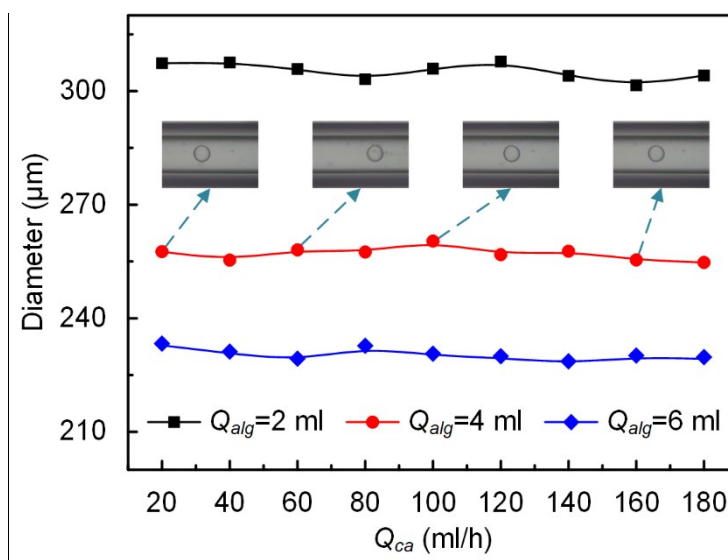

**Figure S7** The relationship between the diameter of oil-droplet precursors and  $Q_{ca}$  under different  $Q_{alg}$ , the  $Q_{oil}$  is fixed at  $100 \mu\text{l h}^{-1}$ .

### Supplementary Video

**Video S1** The generation process of microfibers containing deformed oil-droplet templates based on droplet micfluidics.

**Video S2** The breakup process of rod-like droplet within microfibers after collection.
